# Supplementary material for: Unhealthy Attitude or Behavior Factors and Habitual Sugar Sweetened Beverages Consumption in Junior School Students: a Cross-Sectional Study in 2020 and Long Term Trend From 2012 to 2020
Source: Research Square preprint supplement (doi:10.21203/rs.3.rs-96854/v1), 2020-10-28
Supplement: Supplementary file 1 [file 1e27929d5aee98916b46d309.docx]

**Supplementary Table 2** Results of binary logistic regression analysis: risk factors versus SSBs consumption frequency (stratified by gender)

| Gender | Model | Nagelkerke’s R2 | | Variables | OR:95%CIa | ***P***-value**a** |
| --- | --- | --- | --- | --- | --- | --- |
| Total | Change |
| Male | Model 1 | 0.101* | 0.101* | Region | n.s. |  |
| (n=758) |  |  |  | Family structure | n.s. |  |
|  |  |  |  | Household income per capita | 1.899 (1.156-3.118) | **0.011** |
|  |  |  |  | Father's education level | n.s. |  |
|  |  |  |  | Mother's education level | n.s. |  |
|  |  |  |  | Pocket money per month | 1.938 (1.454-2.583) | **<0.001** |
|  | Model 2 | 0.247* | 0.146* | Just want to drink SSBs | 2.320 (1.363-3.948) | **0.002** |
|  |  |  |  | Deem SSBs not affect health | 1.927 (1.225-3.031) | **0.005** |
|  |  |  |  | Drink SSBs as water | 7.286 (3.697-14.356) | **<0.001** |
|  |  |  |  | Purchase SSBs in advance | 2.264 (1.252-4.094) | **0.007** |
| Female | Model 1 | 0.094* | 0.094* | Region | 0.495 (0.248-0.988) | **0.046** |
| (n=708) |  |  |  | Family structure | 2.245 (1.149-4.389) | **0.018** |
|  |  |  |  | Household income per capita | 2.617(1.431-4.787) | **0.002** |
|  |  |  |  | Father's education level | 0.451 (0.208-0.978) | **0.044** |
|  |  |  |  | Mother's education level | n.s. |  |
|  |  |  |  | Pocket money per month | n.s. |  |
|  | Model 2 | 0.411* | 0.317* | Just want to drink SSBs | 2.477 (1.257-4.881) | **0.009** |
|  |  |  |  | Deem SSBs not affect health | 3.663 (2.384-5.626) | **<0.001** |
|  |  |  |  | Drink SSBs as water | 16.406(8.059-33.397) | **<0.001** |
|  |  |  |  | Purchase SSBs in advance | 2.409 (1.246-4.660) | **0.009** |

n.s.: not significant

a: OR and *P* value in final model

*: *P*<0.001
