# Supplementary material for: Unhealthy Attitude or Behavior Factors and Habitual Sugar Sweetened Beverages Consumption in Junior School Students: a Cross-Sectional Study in 2020 and Long Term Trend From 2012 to 2020
Source: Research Square preprint supplement (doi:10.21203/rs.3.rs-96854/v1), 2020-10-28
Supplement: Supplementary file 2 [file fac6eeb9def936e06350b17c.docx]

**Supplementary Table 1** Results of binary logistic regression analysis: risk factors versus SSBs consumption frequency (stratified by region)

| Area | Model | Nagelkerke’s R2 | | Variables | OR:95%CIa | ***P***-value**a** |
| --- | --- | --- | --- | --- | --- | --- |
| Total | Change |
| Northern China | Model 1 | 0.084* | 0.084* | Gender | 0.398 (0.212-0.746) | **0.004** |
| (n=1062) |  |  |  | Region | n.s. |  |
|  |  |  |  | Family structure | 2.206 (1.102-4.413) | **0.025** |
|  |  |  |  | Household income per capita | 2.030(1.144-3.601) | **0.016** |
|  |  |  |  | Father's education level | n.s. |  |
|  |  |  |  | Mother's education level | n.s. |  |
|  |  |  |  | Pocket money per month | 1.706(1.231-2.364) | **0.001** |
|  | Model 2 | 0.281* | 0.197* | Just want to drink SSBs | n.s. |  |
|  |  |  |  | Deem SSBs not affect health | 3.398 (2.132-5.413) | **<0.001** |
|  |  |  |  | Drink SSBs as water | 12.049(5.922-24.515) | **<0.001** |
|  |  |  |  | Purchase SSBs in advance | 3.280 (1.719-6.256) | **<0.001** |
| Southern China | Model 1 | 0.178* | 0.178* | Gender | n.s. |  |
| (n=404) |  |  |  | Region | 0.478 (0.249-0.917) | **0.026** |
|  |  |  |  | Family structure | n.s. |  |
|  |  |  |  | Household income per capita | n.s. |  |
|  |  |  |  | Father's education level | 0.379 (0.189-0.760) | **0.006** |
|  |  |  |  | Mother's education level | n.s. |  |
|  |  |  |  | Pocket money per month | 1.621 (1.308-2.011) | **<0.001** |
|  | Model 2 | 0.388* | 0.210* | Just want to drink SSBs | 2.835 (1.447-5.552) | **0.002** |
|  |  |  |  | Deem SSBs not affect health | 1.989 (1.291-3.066) | **0.002** |
|  |  |  |  | Drink SSBs as water | 10.843 (5.027-23.388) | **<0.001** |
|  |  |  |  | Purchase SSBs in advance | n.s. |  |

n.s.: not significant

a: OR and *P* value in final model

*: *P*<0.001
